# Supplementary material for: Phenytoin silver: a new nanocompound for promoting dermal wound healing via comprehensive pharmacological action
Source: PubMed Central journal article supplement — Theranostics. 2017 Jan 5;7(2):425–35. doi: 10.7150/thno.17073 (PMC5327358; doi:10.7150/thno.17073), 2017-01-05
Supplement: thnov07p0425s1.pdf [file thnov07p0425s1.pdf]

Supplement data

Figure 1 NMR-H spectrum of compound PnAg (400 MHz, DMSOd6)

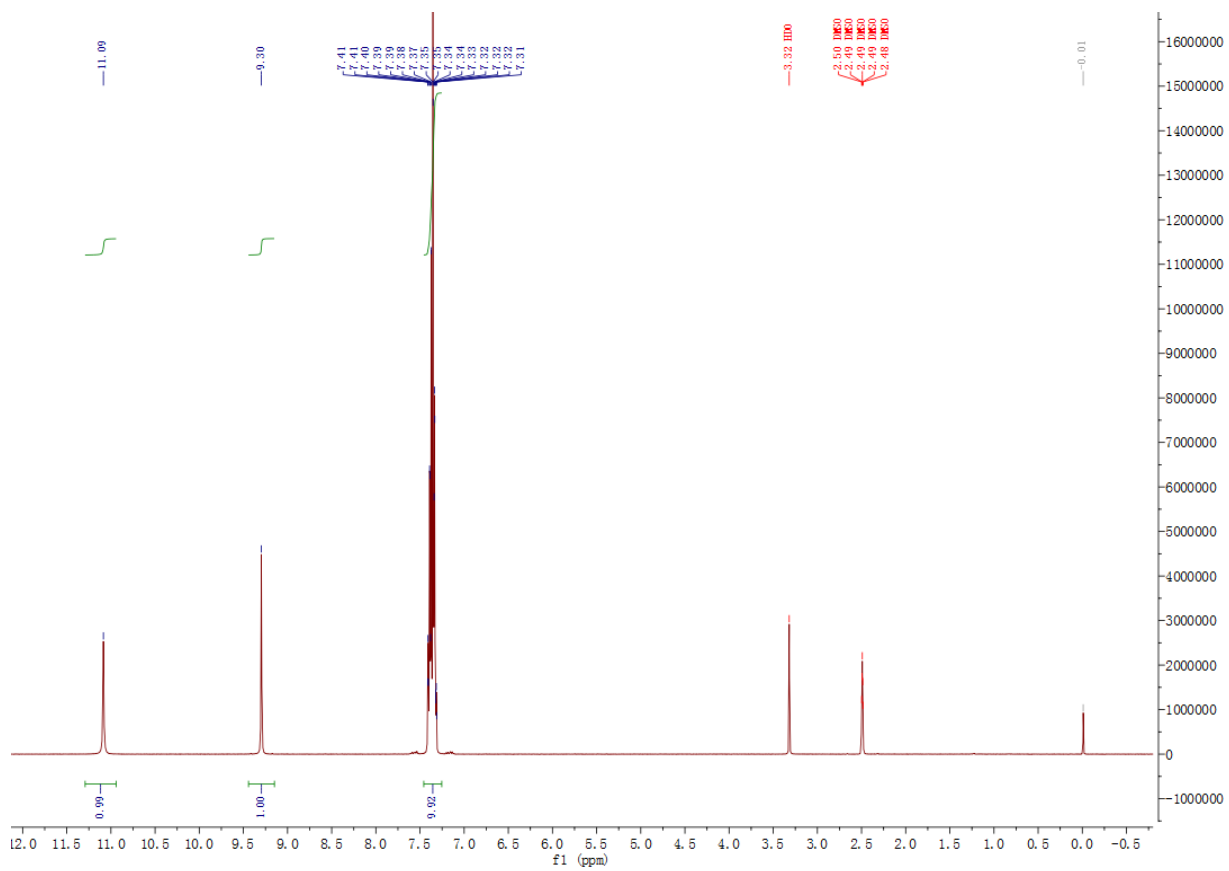

Figure 2 FTIR spectrum of compound PnAg

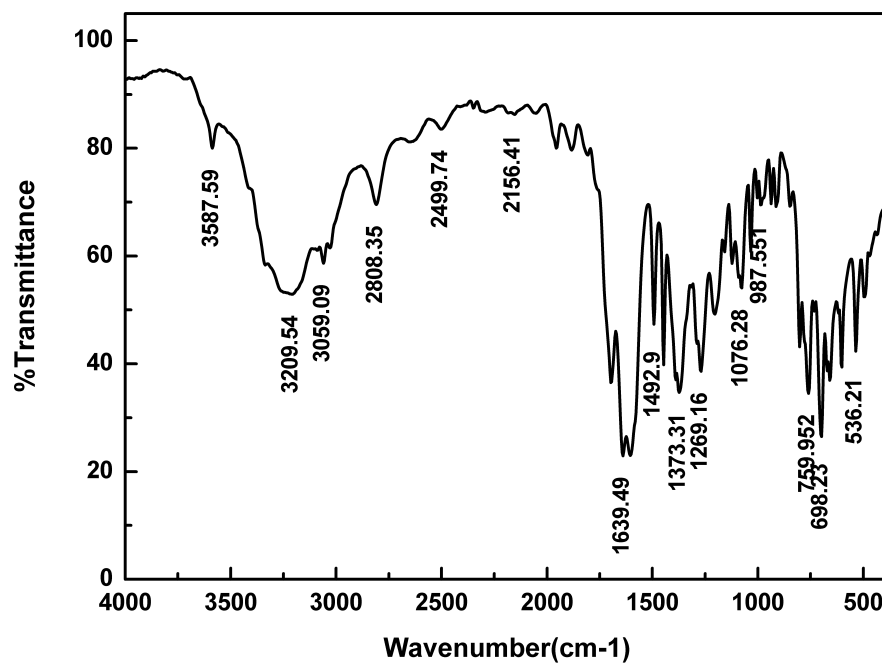

Table 1 Primers used in qRT-PCR analysis

| Gene name      | Primer name      | Sequence                   |
|----------------|------------------|----------------------------|
| Collagen I     | Collagen I-F     | 5' TCCTGGCAAAGACGGACTC 3'  |
|                | Collagen I-R     | 5' CAAGGTCACGGTCACGAAC 3'  |
| NF- $\kappa$ B | NF- $\kappa$ B-F | 5' GAGGCATGTTTCGGTAGTGG 3' |
|                | NF- $\kappa$ B-R | 5' TCCGGGATGGAATGTAATC 3'  |
| TGF- $\beta$   | TGF- $\beta$ -F  | 5' GGCGGTGCTCGCTTTGTAC 3'  |
|                | TGF- $\beta$ -R  | 5' AGCCACTCAGGCGTATCAG 3'  |
| MMP2           | MMP2-F           | 5' GTTCTTCGCAGGGAATGAG 3'  |
|                | MMP2-R           | 5' TCCAAACTTCACGCTCTTG 3'  |
| MMP9           | MMP9-F           | 5' TGTGACAGGCACTTCACCG 3'  |
|                | MMP9-R           | 5' TCCCTAACGCCAGTAGAG 3'   |
| GAPDH          | GAPDH-F          | 5' GTTCCTCGTCCCGTAGAC 3'   |
|                | GAPDH-R          | 5' CAATCTCCACTTTGCCACT 3'  |
